# Supplementary material for: The methodology for assessing smoking-attributed mortality based on All Causes of Death Surveillance in Tianjin, China, 2010–2015
Source: PubMed Central journal article supplement (PMC7132577; doi:10.18332/tid/116970), 2020-03-23
Supplement: TID-18-21-s2.pdf [file TID-18-21-s2.pdf]

**Figure 1. Smoking attributed mortality in all causes of death and lung cancer in men in Tianjin and other counties/regions**

**A**

**All causes of death**

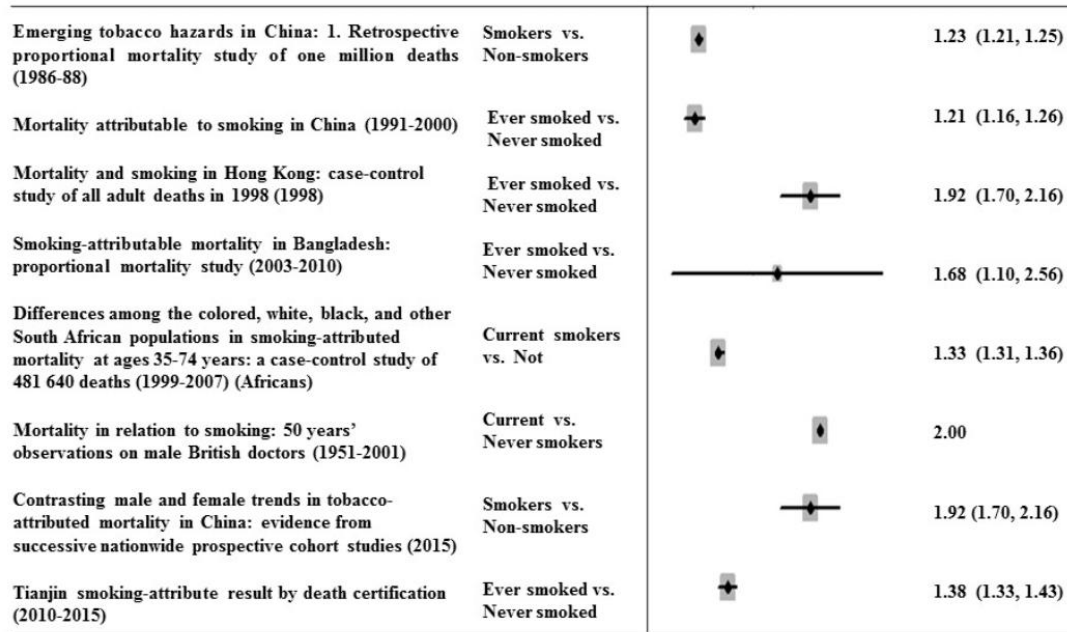

1.0

**B**

**Lung Cancer**

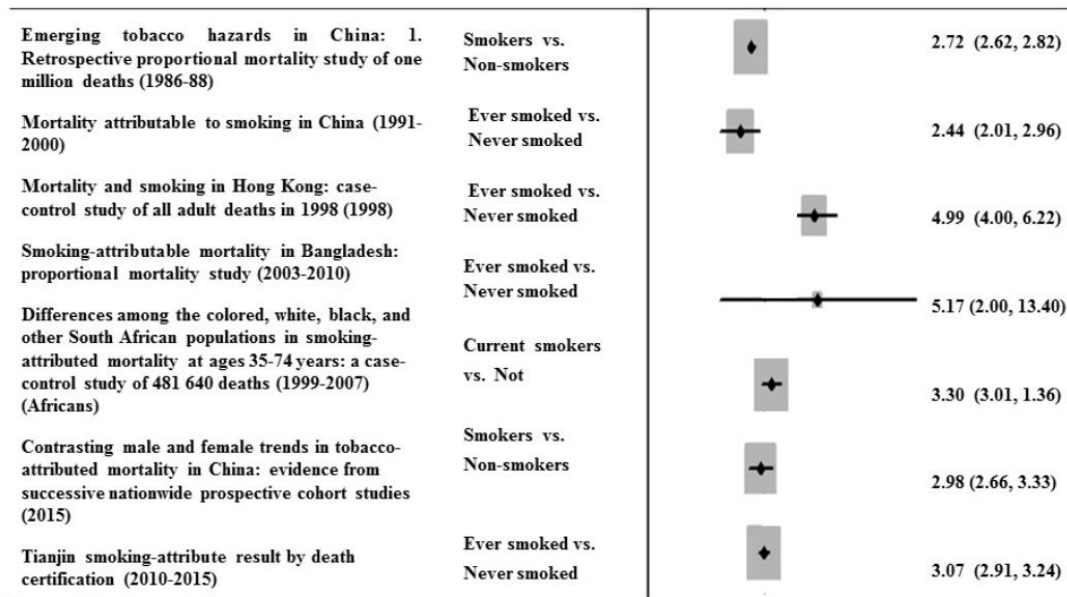

1.0

**Figure 2. Smoking attributed mortality in all causes of death and lung cancer in women in Tianjin and other counties/regions**

**A All causes of death**

|                                                                                                                                                                                                     |                              |  |                   |
|-----------------------------------------------------------------------------------------------------------------------------------------------------------------------------------------------------|------------------------------|--|-------------------|
| Emerging tobacco hazards in China: 1. Retrospective proportional mortality study of one million deaths (1986-88)                                                                                    | Smokers vs. Non-smokers      |  | 1.23              |
| Mortality attributable to smoking in China (1991-2000)                                                                                                                                              | Ever smoked vs. Never smoked |  | 1.41 (1.33, 1.49) |
| Mortality and smoking in Hong Kong: case-control study of all adult deaths in 1998 (1998)                                                                                                           | Ever smoked vs. Never smoked |  | 1.62 (1.40, 1.88) |
| Smoking-attributable mortality in Bangladesh: proportional mortality study (2003-2010)                                                                                                              | Ever smoked vs. Never smoked |  |                   |
| Differences among the colored, white, black, and other South African populations in smoking-attributed mortality at ages 35-74 years: a case-control study of 481 640 deaths (1999-2007) (Africans) | Current smokers vs. Not      |  | 1.30 (1.27, 1.34) |
| Mortality in relation to smoking: 50 years' observations on male British doctors (1951-2001)                                                                                                        | Current vs. Never smokers    |  |                   |
| Contrasting male and female trends in tobacco-attributed mortality in China: evidence from successive nationwide prospective cohort studies (2015)                                                  | Smokers vs. Non-smokers      |  | 1.51 (1.40, 1.63) |
| Tianjin smoking-attribute result by death certification (2010-2015)                                                                                                                                 | Ever smoked vs. Never smoked |  | 1.46 (1.39, 1.54) |

**B Lung Cancer**

|                                                                                                                                                                                                     |                              |  |                   |
|-----------------------------------------------------------------------------------------------------------------------------------------------------------------------------------------------------|------------------------------|--|-------------------|
| Emerging tobacco hazards in China: 1. Retrospective proportional mortality study of one million deaths (1986-88)                                                                                    | Smokers vs. Non-smokers      |  | 2.64              |
| Mortality attributable to smoking in China (1991-2000)                                                                                                                                              | Ever smoked vs. Never smoked |  | 2.76 (2.18, 3.49) |
| Mortality and smoking in Hong Kong: case-control study of all adult deaths in 1998 (1998)                                                                                                           | Ever smoked vs. Never smoked |  | 3.06 (2.30, 4.07) |
| Smoking-attributable mortality in Bangladesh: proportional mortality study (2003-2010)                                                                                                              | Ever smoked vs. Never smoked |  |                   |
| Differences among the colored, white, black, and other South African populations in smoking-attributed mortality at ages 35-74 years: a case-control study of 481 640 deaths (1999-2007) (Africans) | Current smokers vs. Not      |  | 4.13 (3.48, 4.89) |
| Contrasting male and female trends in tobacco-attributed mortality in China: evidence from successive nationwide prospective cohort studies (2015)                                                  | Smokers vs. Non-smokers      |  | 1.51 (1.40, 1.63) |
| Tianjin smoking-attribute result by death certification (2010-2015)                                                                                                                                 | Ever smoked vs. Never smoked |  | 4.07 (3.81, 4.35) |
