# Supplementary material for: The methodology for assessing smoking-attributed mortality based on All Causes of Death Surveillance in Tianjin, China, 2010–2015
Source: PubMed Central journal article supplement (PMC7132577; doi:10.18332/tid/116970), 2020-03-23
Supplement: TID-18-21-s3.pdf [file TID-18-21-s3.pdf]

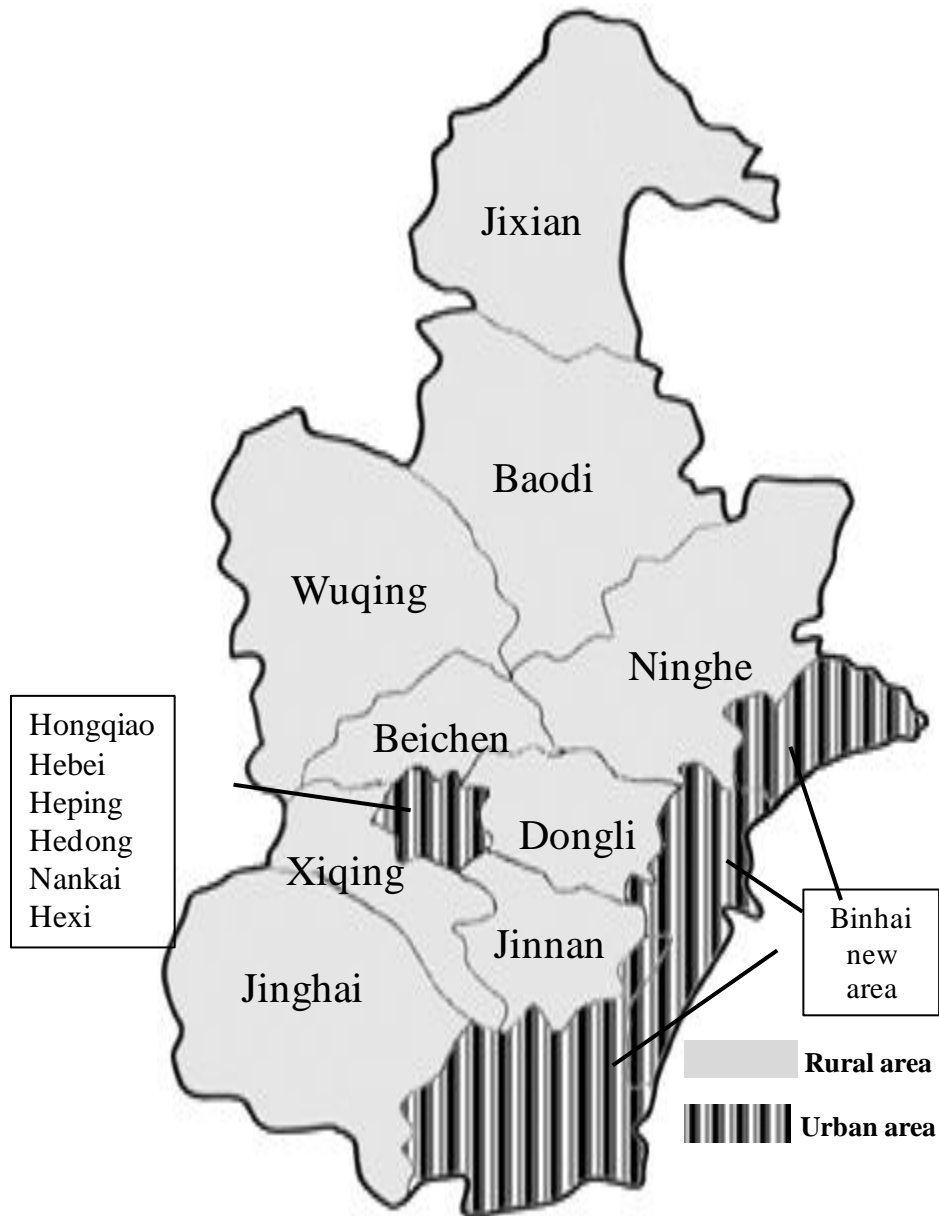

*Map of Tianjin, China*
